# Supplementary material for: A multiplex platform for small RNA sequencing elucidates multifaceted tRNA stress response and translational regulation
Source: PubMed Central journal article supplement (PMC9072684; doi:10.1038/s41467-022-30261-3), 2022-05-05
Supplement: 41467_2022_30261_MOESM2_ESM.pdf [file 41467_2022_30261_MOESM2_ESM.pdf]

**Editorial Note:** This manuscript has been previously reviewed at another journal that is not operating a transparent peer review scheme. The manuscript was considered suitable for publication without further review at *Nature Communications*.
